# Supplementary material
Source: publisher figshare collection journal article supplement (https://gsapubs.figshare.com/articles/dataset/_/24521425)
Supplement: Supplementary file 1 [file 1]

## Sheet: aTiO2 from oxides
aTiO2 from Fe-Ti oxides, retrieved from Ghiorso and Gualda (2013)
Bishop Tuff			Fish Canyon Tuff			Shiveluch			Yellowstone								References
full sequence			outflow sheet of the tuff			2001-2004 eruptions			Lava Creek and Huckeberry Ridge Tuff (1), Cougar Point Tuff (2)								Blundy, J., Cashman, K., and Humphreys, M., 2006, Magma heating by decompression-driven crystallization beneath andesite volcanoes: Nature, v. 443, p. 76–80, doi:10.1038/nature05100.
Hildreth, 1977			Whitney and Stormer, 1985			Blundy et al 2006			(1) Hildreth, 1981; (2) Cathey and Nash, 2004								Cathey, H.E., and Nash, B.P., 2004, The Cougar Point Tuff: Implications for Thermochemical Zonation and Longevity of High-Temperature, Large-Volume Silicic Magmas of the Miocene Yellowstone Hotspot: Journal of Petrology, v. 45, p. 27–58, doi:10.1093/petrology/egg081.
T	aTiO2		T	aTiO2		T	aTiO2		T	aTiO2							Hildreth, E.W., 1977, The magma chamber of the Bishop Tuff: Gradients in Temperature, Pressure, and Composition: University of California, Berkeley
594.116	0.188907		652.798	0.858192		736.876	0.86131		732.976	0.311008							Hildreth, W., 1981, Gradients in silicic magma chambers: Implications for lithospheric magmatism: Journal of Geophysical Research: Solid Earth, v. 86, p. 10153–10192, doi:10.1029/JB086iB11p10153.
670.281	0.336344		653.665	0.565117		739.91	0.884901		754.645	0.315431							Whitney, J.A., and Stormer, J.C., JR., 1985, Mineralogy, Petrology, and Magmatic Conditions from the Fish Canyon Tuff, Central San Juan Volcanic Field, Colorado: Journal of Petrology, v. 26, p. 726–762, doi:10.1093/petrology/26.3.726
676.306	0.42315		655.832	0.904852		742.077	0.844626		767.214	0.364799
698.033	0.471192		665.8	0.895335		745.111	0.877213		809.253	0.419865
711.519	0.492556		685.014	0.87715		758.112	0.802478		841.035	0.44181
714.871	0.455819		683.569	0.730516		767.647	0.857895		866.894	0.547637
727.163	0.541401		688.77	0.846586		771.548	0.797795		872.961	0.465389
737.403	0.540115		690.937	0.881406		784.116	0.774379		888.563	0.474658
748.765	0.595207		713.473	0.81162		792.35	0.802478		896.365	0.542271
751.266	0.582073		711.739	0.779265		797.118	0.7615		898.965	0.491146
751.893	0.556314		731.676	0.793194		807.086	0.778282		909.366	0.458462
754.847	0.516707		740.452	0.738786		821.821	0.781989		947.505	0.523636
774.254	0.620203		746.411	0.748507		850.425	0.755646		860.944	0.490435
791.156	0.589529		757.679	0.751118		853.025	0.72784		859.657	0.478841
801.331	0.606767		682.833	0.870115		869.928	0.73106		864.378	0.473043
807.606	0.660876		710.73	0.817241		875.995	0.694766		856.652	0.433623
811.603	0.686013		716.309	0.808046		882.496	0.724913		854.506	0.41971
826.949	0.662994		738.197	0.733333		871.245	0.708406		851.073	0.423188
831.804	0.600956					753.219	0.851014		846.781	0.434783
850.168	0.650237					755.794	0.848696		835.622	0.43942
726.855	0.447205					752.361	0.842899		833.476	0.424348
704.594	0.454658					1029.61	0.62029		827.039	0.431304
700.618	0.454658					846.352	0.771014		842.489	0.412754
702.473	0.463354					896.996	0.702609		837.768	0.397681
704.329	0.49441					899.142	0.691014		833.906	0.377971
702.473	0.486957					894.421	0.686377		819.313	0.418551
701.943	0.474534								821.459	0.411594
703.799	0.477019
710.159	0.506832
710.424	0.470807
711.749	0.480745
714.134	0.481988
803.975	0.655901
805.83	0.64472
804.505	0.640994
807.155	0.632298
805.565	0.626087
798.675	0.632298
796.29	0.627329
795.76	0.638509
793.11	0.643478
794.965	0.613665
794.7	0.604969
788.339	0.642236
788.339	0.626087
784.629	0.623602
783.304	0.612422
784.629	0.607453
783.569	0.6
781.714	0.598758
780.124	0.604969
780.124	0.593789
775.088	0.591304
773.233	0.603727
769.788	0.56646
772.173	0.565217
768.198	0.581366
766.608	0.591304
763.163	0.580124
760.512	0.56646
758.922	0.573913
756.537	0.56646
706.714	0.486957
709.099	0.49441
714.134	0.509317
716.519	0.513043
719.7	0.518012
723.41	0.525466
724.205	0.518012
722.35	0.520497
722.35	0.510559
720.495	0.50559
717.314	0.50559
714.134	0.496894
712.544	0.500621
687.102	0.475776
687.633	0.481988
690.018	0.480745
734.806	0.51677
728.18	0.511801
729.77	0.514286
728.445	0.522981
731.625	0.524224
736.131	0.530435
739.046	0.536646
734.541	0.537888
734.011	0.530435
753.887	0.570186
755.742	0.557764
748.057	0.552795
746.731	0.560248
744.346	0.552795
742.226	0.561491
740.106	0.549068
741.696	0.551553
737.986	0.55528
734.806	0.556522
